# Supplementary material for: Selection and evaluation of lactic acid bacteria from chicken feces in Thailand as potential probiotics
Source: PeerJ. 2023 Dec 14;11:e16637. doi: 10.7717/peerj.16637 (PMC10725671; doi:10.7717/peerj.16637)
Supplement: Supplemental Information 2 [file peerj-11-16637-s002.xlsx]

## Sheet: Raw data of Table 1.
Table S2: the acid, bile salts and phenol tolerance of LAB isolates.
Pre-screening for resistance to pH 2.5 and 0.3% bile salts									Resistance to acid at various pH levels, bile salt concentrations at a temperature of 42°C and 0.4% phenol
Chicken type	Isolate	MALDI TOF-MS	Isolate name	Control 3 h; 37°C	LAB survival at pH2.5; 3 h; 37°C	Control 3 h; 37°C	LAB survival at 0.3% bile salt; 3 h; 37°C		Survival rate %		Lac. LF2	Ped. LF4	Lac. LF6	Lac. LF7	Lac. LF10	Ped. BF3	Ped. BF6	Ped. BF8	Ped. BF9	Lac. BF12	Ped. BF14	Ped. BF18	Ped. BF19	Lac. BYF1	Ped. BYF19	Ped. BYF20	Ped. BYF21	Ped. BYF26	Ped. BYF27	Ped. BYF28
				log10 (CFU/ml)	log10 (CFU/ml)	log10 (CFU/ml)	log10 (CFU/ml)		0.3% bile salt; 6 h; 42°C
Laying hen	MCAE P3 Re3 (3/1)	Ligilactobacillus salivarius	Lac. LF1	6.699	0	6.699	5.869			1	12.2418	62.29	0	0	0	67.19	82.27	73.02	83.83	72.9	71.99	62.3	63.73	0	78.11	78.54	78.97	82.68	62.8	56.96
Laying hen	MCAE P4 Re3 (3/1)	Ligilactobacillus salivarius	Lac. LF2	8.288	4.217	8.288	5.352			2	12.8846	55.92	0	0	0	59.84	82.7	74.05	85.71	70.59	72.41	63.84	66.51	0	78.73	77.77	79.31	81.53	52.22	49.07
Laying hen	MCAE P6 Re2 (2/1)	Ligilactobacillus salivarius	Lac. LF3	8.053	0	8.053	3.839			Mean	12.5632	59.105	0	0	0	63.515	82.485	73.535	84.77	71.745	72.2	63.07	65.12	0	78.42	78.155	79.14	82.105	57.51	53.015
Laying hen	MCAE P6 Re2 (2/3)	Pediococcus acidilactici	Ped. LF4	9.389	5.491	9.389	6.602			SD	0.454507	4.50427	0	0	0	5.19723	0.304056	0.72832	1.32936	1.63342	0.296985	1.08894	1.96576	0	0.438406	0.544472	0.240416	0.813173	7.48119	5.57907
Laying hen	MCAE P6 Re3 (3/1)	Lactobacillus crispatus	Lac. LF5	8.276	0	8.276	0		0.7% bile salt; 6 h; 42°C
Laying hen	RMUTE P1 Re1 (1/1)	Ligilactobacillus salivarius	Lac. LF6	8.813	7.1	8.471	4.74			1	0	14.67	0	0	0	9.18	76.79	10.63	68.01	49.35	44.07	10.75	4.23	0	67.67	72.51	75.39	74.57	69.47	70.07
Laying hen	RMUTE P2 Re2 (2/2)	Ligilactobacillus salivarius	Lac. LF7	8.562	6.922	8.276	4.585			2	0	11.62	0	0	0	5.77	79.21	2.02	69.11	48.81	50.43	12.68	9.58	0	70.83	71.7	74.59	76.52	69.28	61.05
Laying hen	RMUTE P2 Re3 (3/1)	Ligilactobacillus salivarius	Lac. LF8	10.301	0	10.301	3.352			Mean	0	13.145	0	0	0	7.475	78	6.325	68.56	49.08	47.25	11.715	6.905	0	69.25	72.105	74.99	75.545	69.375	65.56
Laying hen	RMUTE P4 Re1 (1/1)	Ligilactobacillus salivarius	Lac. LF9	9.117	4.55	9.117	0			SD	0	2.15668	0	0	0	2.41123	1.7112	6.08819	0.777817	0.381838	4.4972	1.36472	3.78302	0	2.23446	0.572756	0.565685	1.37886	0.13435	6.3781
Laying hen	RMUTE P7 Re1 (1/1)	Ligilactobacillus salivarius	Lac. LF10	7.498	7.414	7.498	4.716		pH2.5; 3 h; 42°C
Broiler	TFA P1 Re1 (1/1)	Ligilactobacillus salivarius	Lac. BF1	6.699	0	8.929	4.407			1	-	0	-	-	-	0	14.87	13.65	72.28	59.44	56.67	0	0	-	47.92	52.78	0	65.68	0	0
Broiler	TFA P2 Re2 (2/1)	Pediococcus acidilactici	Ped. BF2	9.117	3.477	9.117	7.261			2	-	0	-	-	-	13.23	6.68	11.81	72.96	57.71	56.48	0	0	-	47.71	52.73	18.03	68.51	0	0
Broiler	TFA P2 Re2 (2/2)	Pediococcus acidilactici	Ped. BF3	9.225	4.097	9.225	7.518			Mean	-	0	-	-	-	6.615	10.775	12.73	72.62	58.575	56.575	0	0	-	47.815	52.755	9.015	67.095	0	0
Broiler	TFA P3 Re1 (1/1)	Ligilactobacillus salivarius	Lac. BF4	8.292	0	8.292	0			SD	-	0	-	-	-	9.35502	5.7912	1.30108	0.480833	1.22329	0.13435	0	0	-	0.148492	0.0353553	12.7491	2.00111	0	0
Broiler	TFA P4 Re2 (2/1)	Pediococcus acidilactici	Ped. BF5	9.072	2.477	9.32	7.435		pH4.5; 12 h; 42°C
Broiler	TFA P4 Re2 (2/2)	Pediococcus acidilactici	Ped. BF6	8.756	4.461	8.809	7.384			1	-	-	-	-	-	-	-	-	99.1	99.25	96.52	-	-	-	77.88	78.1	78.74	97.87	-	-
Broiler	TFA P5 Re2 (2/1)	Pediococcus acidilactici	Ped. BF7	8.878	2.813	9.269	6.701			2	-	-	-	-	-	-	-	-	98.75	97.58	97.45	-	-	-	77.88	78.08	78.9	98.86	-	-
Broiler	TFA P5 Re3 (3/2)	Pediococcus acidilactici	Ped. BF8	8.875	4.049	8.875	7			Mean	-	-	-	-	-	-	-	-	98.925	98.415	96.985	-	-	-	77.88	78.09	78.82	98.365	-	-
Broiler	TFB P1 Re3 (3/1)	Pediococcus acidilactici	Ped. BF9	8.854	4.989	8.857	7.095			SD	-	-	-	-	-	-	-	-	0.247487	1.18087	0.657609	-	-	-	0	0.0141421	0.113137	0.700036	-	-
Broiler	TFB P1 Re3 (3/2)	Pediococcus acidilactici	Ped. BF10	8.881	2.477	8.881	7		0.4% phenol
Broiler	TFB P2 Re2 (2/1)	Pediococcus acidilactici	Ped. BF11	8.803	3.079	8.69	3.903			1	-	-	-	-	-	-	-	-	114.975	135.26	91.62	-	-	-	-	104.51	-	115.75	-	-
Broiler	TFB P4 Re1 (1/1)	Ligilactobacillus salivarius	Lac. BF12	8.562	7.477	8.562	4.217			2	-	-	-	-	-	-	-	-	93.9969	132.93	127.39	-	-	-	-	107.95	-	116.7	-	-
Broiler	TFB P4 Re2 (2/2)	Pediococcus acidilactici	Ped. BF13	9.17	2.602	9.493	6.274			3	-	-	-	-	-	-	-	-	102.921	130.192	125.85	-	-	-	-	96.34	-	109.77	-	-
Broiler	TFB P4 Re3 (3/1)	Pediococcus acidilactici	Ped. BF14	8.944	6.42	9.502	5.756			Mean	-	-	-	-	-	-	-	-	103.964	132.794	114.953	-	-	-	-	102.933	-	114.073	-	-
Broiler	TFB P5 Re2 (2/1)	Pediococcus acidilactici	Ped. BF15	9.423	5.703	7.806	3.455			SD	-	-	-	-	-	-	-	-	10.528	2.5366	20.2219	-	-	-	-	5.96342	-	3.75694	-	-
Broiler	C1 R1 (1/2)	Ligilactobacillus salivarius	Lac. BF16	8.262	4.146	8.262	3.684
Broiler	C2 R1 (1/1)	Pediococcus acidilactici	Ped. BF17	8.602	3.398	8.602	5.243
Broiler	C3 R1 (1/1)	Pediococcus acidilactici	Ped. BF18	8.116	6.23	8.116	4.597
Broiler	C6 R2 (2/2)	Pediococcus acidilactici	Ped. BF19	8.07	4.681	8.07	4.254
Broiler	C6 R3 (3/1)	Pediococcus acidilactici	Ped. BF20	7.906	3.562	7.906	4.317
Broiler	D1 R1 (1/1)	Pediococcus acidilactici	Ped. BF21	8.37438	2	8.37438	3.607
Broiler	D1 R2 (2/1)	Pediococcus acidilactici	Ped. BF22	7.968	0	7.968	4.525
Broiler	D1 R3 (3/2)	Pediococcus acidilactici	Ped. BF23	8.074	3.829	8.074	3.744
Broiler	D3 R1 (1/2)	Pediococcus acidilactici	Ped. BF24	8.459	7.166	8.459	0
Broiler	D3 R1 (1/3)	Pediococcus acidilactici	Ped. BF25	9.195	0	9.195	6.74
Broiler	D3 R2 (2/1)	Pediococcus acidilactici	Ped. BF26	9.23	0	9.23	4.119
Broiler	D4 R1 (1/1)	Pediococcus acidilactici	Ped. BF27	9.418	0	9.418	4.271
Broiler	D6 R2 (2/1)	Pediococcus acidilactici	Ped. BF28	9.26	0	9.26	5.801
Thai native chicken	E1 R3 (3/2)	Ligilactobacillus salivarius	Lac. BYF1	8.564	7.477	8.564	4.332
Thai native chicken	E2 R1 (1/1)	Pediococcus acidilactici	Ped. BYF2	8.912	0	8.912	7.611
Thai native chicken	E2 R1 (1/2)	Pediococcus acidilactici	Ped. BYF3	9.007	0	9.007	7.65
Thai native chicken	E2 R2 (2/1)	Limosilactobacillus fermentum	Lac. BYF4	8.161	6.346	8.161	3.727
Thai native chicken	E2 R2 (2/2)	Limosilactobacillus fermentum	Lac. BYF5	8.301	6.716	8.301	3.778
Thai native chicken	E2 R3 (3/2)	Pediococcus acidilactici	Ped. BYF6	9.035	0	9.035	7.611
Thai native chicken	E2 R3 (3/3)	Pediococcus acidilactici	Ped. BYF7	8.929	0	8.929	7.568
Thai native chicken	E3 R1 (1/1)	Ligilactobacillus salivarius	Lac. BYF8	7.633	0	8.543	4.002
Thai native chicken	E3 R1 (1/3)	Ligilactobacillus salivarius	Lac. BYF9	8.742	7	8.742	3
Thai native chicken	E3 R3 (3/1)	Ligilactobacillus salivarius	Lac. BYF10	8.763	7.525	8.763	0
Thai native chicken	E3 R3 (3/2)	Ligilactobacillus salivarius	Lac. BYF11	7.699	0	7.699	5.23
Thai native chicken	G1 R1 (1/2)	Lactobacillus crispatus	Lac. BYF12	8.073	0	8.073	0
Thai native chicken	G1 R2 (2/4)	Lactobacillus kitasatonis	Lac. BYF13	8.415	0	8.415	3.993
Thai native chicken	G1 R3 (3/2)	Lactobacillus crispatus	Lac. BYF14	8.171	0	8.171	0
Thai native chicken	G2 R3 (3/1)	Lactobacillus kitasatonis	Lac. BYF15	8.716	0	8.716	4.386
Thai native chicken	G3 R1 (1/2)	Lactobacillus kitasatonis	Lac. BYF16	8.204	4.146	8.204	0
Thai native chicken	G3 R1 (1/3)	Lactobacillus kitasatonis	Lac. BYF17	8.29	4.72	8.29	3.845
Thai native chicken	G3 R1 (1/4)	Lactobacillus kitasatonis	Lac. BYF18	8.354	2	8.354	0
Thai native chicken	H1 R1 (1/2)	Pediococcus acidilactici	Ped. BYF19	9.161	6.334	9.161	7.709
Thai native chicken	H1 R1 (1/3)	Pediococcus acidilactici	Ped. BYF20	8.699	7.097	8.699	7.559
Thai native chicken	H1 R1 (1/4)	Pediococcus acidilactici	Ped. BYF21	8.668	7.141	8.668	7.366
Thai native chicken	H1 R1 (1/6)	Lactobacillus crispatus	Lac. BYF22	8.383	0	8.383	5.171
Thai native chicken	H1 R1 (1/7)	Lactobacillus crispatus	Lac. BYF23	8.469	0	8.469	5.025
Thai native chicken	H1 R2 (2/2)	Lactobacillus kitasatonis	Lac. BYF24	7.753	0	7.753	0
Thai native chicken	H1 R2 (2/3)	Lactobacillus kitasatonis	Lac. BYF25	8.415	0	8.415	2
Thai native chicken	H1 R3 (3/1)	Pediococcus acidilactici	Ped. BYF26	8.668	7.477	8.668	7.667
Thai native chicken	H1 R3 (3/2)	Pediococcus acidilactici	Ped. BYF27	8.823	6.885	8.823	7.72
Thai native chicken	H1 R3 (3/3)	Pediococcus acidilactici	Ped. BYF28	9.1	6.954	9.1	7.23
Laying hen	A1/1	Pediococcus pentosaceus	Ped. LF11	8.067	3	8.067	5.319
Laying hen	A1/2	Pediococcus pentosaceus	Ped. LF12	7.962	3.222	7.962	5.156
Laying hen	A1/3	Pediococcus pentosaceus	Ped. LF13	8.021	6.487	8.021	3
Laying hen	A1/4	Pediococcus pentosaceus	Ped. LF14	8.74	3	8.74	7.152
Laying hen	A1/5	Pediococcus pentosaceus	Ped. LF15	8.699	3	8.699	7.121
Laying hen	A1/6	Pediococcus pentosaceus	Ped. LF16	8.669	3	8.669	7.013
Laying hen	A1/7	Pediococcus pentosaceus	Ped. LF17	8.778	3	8.778	4.301
Laying hen	A1/8	Pediococcus pentosaceus	Ped. LF18	8.452	3	8.452	3.875
Laying hen	A2/3	Ligilactobacillus salivarius	Lac. LF19	8.903	4.204	8.903	3
Laying hen	B1/2	Ligilactobacillus salivarius	Lac. LF20	7.962	6.305	7.962	3
Laying hen	B2/1	Ligilactobacillus salivarius	Lac. LF21	8	3	8	3
Laying hen	B2/2	Ligilactobacillus salivarius	Lac. LF22	7.993	4.061	7.993	3
Laying hen	B2/6	Ligilactobacillus salivarius	Lac. LF23	7.813	2.824	7.813	3
Laying hen	B3/1	Pediococcus pentosaceus	Ped. LF24	8.312	3	8.312	3
Laying hen	B3/2	Pediococcus pentosaceus	Ped. LF25	8.865	3	8.865	3
Laying hen	B3/3	Pediococcus pentosaceus	Ped. LF26	8.875	3	8.875	4.79
Laying hen	B3/4	Pediococcus pentosaceus	Ped. LF27	8.912	3	8.912	3
Laying hen	B3/5	Pediococcus pentosaceus	Ped. LF28	8.912	3	8.912	3
Laying hen	B3/6	Pediococcus pentosaceus	Ped. LF29	8.921	3	8.921	3
Laying hen	B3/7	Pediococcus pentosaceus	Ped. LF30	8.894	3	8.894	3
Laying hen	B3/8	Pediococcus pentosaceus	Ped. LF31	8.501	3	8.501	3
Laying hen	B4/3	Ligilactobacillus salivarius	Lac. LF32	7.766	3	7.766	3
Laying hen	B4/8	Ligilactobacillus salivarius	Lac. LF33	7.865	5.653	7.865	3
Laying hen	B5/8	Ligilactobacillus salivarius	Lac. LF34	7.713	6.226	7.713	2.921
Laying hen	B6/1	Ligilactobacillus salivarius	Lac. LF35	8.431	5.643	8.431	3.684

## Sheet: Summary
Table S2: the acid, bile salts and phenol tolerance of LAB isolates.
				Pre-screening for resistance to pH 2.5 and 0.3% bile salts		Resistance to acid at various pH levels and bile salt concentrations at a temperature of 42°C				LAB survival at 0.4% phenol
				LAB survival at pH2.5; 3 h; 37°C	LAB survival at 0.3% bile salt; 3 h; 37°C	LAB survival at 0.3% bile salt; 6 h; 42°C	LAB survival at 0.7% bile salt; 6 h; 42°C	LAB survival at pH2.5; 3 h; 42°C	LAB survival at pH4.5; 12 h; 42°C
Chicken type	Isolate	MALDI TOF-MS	Isolate name	log10 (CFU/ml)	log10 (CFU/ml)	Survival rate (%)	Survival rate (%)	Survival rate (%)	Survival rate (%)	Survival rate (%)
Laying hen	MCAE P3 Re3 (3/1)	Ligilactobacillus salivarius	Lac. LF1	0	5.869	-	-	-	-	-
Laying hen	MCAE P4 Re3 (3/1)	Ligilactobacillus salivarius	Lac. LF2	4.217	5.352	12.56 ± 0.45	0	-	-	-
Laying hen	MCAE P6 Re2 (2/1)	Ligilactobacillus salivarius	Lac. LF3	0	3.839	-	-	-	-	-
Laying hen	MCAE P6 Re2 (2/3)	Pediococcus acidilactici	Ped. LF4	5.491	6.602	59.11 ± 4.51	13.15 ± 2.16	0	-	-
Laying hen	MCAE P6 Re3 (3/1)	Lactobacillus crispatus	Lac. LF5	0	0	-	-	-	-	-
Laying hen	RMUTE P1 Re1 (1/1)	Ligilactobacillus salivarius	Lac. LF6	7.1	4.74	0	0	-	-	-
Laying hen	RMUTE P2 Re2 (2/2)	Ligilactobacillus salivarius	Lac. LF7	6.922	4.585	0	0	-	-	-
Laying hen	RMUTE P2 Re3 (3/1)	Ligilactobacillus salivarius	Lac. LF8	0	3.352	-	-	-	-	-
Laying hen	RMUTE P4 Re1 (1/1)	Ligilactobacillus salivarius	Lac. LF9	4.55	0	-	-	-	-	-
Laying hen	RMUTE P7 Re1 (1/1)	Ligilactobacillus salivarius	Lac. LF10	7.414	4.716	0	0	-	-	-
Broiler	TFA P1 Re1 (1/1)	Ligilactobacillus salivarius	Lac. BF1	0	4.407	-	-	-	-	-
Broiler	TFA P2 Re2 (2/1)	Pediococcus acidilactici	Ped. BF2	3.477	7.261	-	-	-	-	-
Broiler	TFA P2 Re2 (2/2)	Pediococcus acidilactici	Ped. BF3	4.097	7.518	63.52 ± 5.20	7.48 ± 2.41	6.62 ± 9.36	-	-
Broiler	TFA P3 Re1 (1/1)	Ligilactobacillus salivarius	Lac. BF4	0	0	-	-	-	-	-
Broiler	TFA P4 Re2 (2/1)	Pediococcus acidilactici	Ped. BF5	2.477	7.435	-	-	-	-	-
Broiler	TFA P4 Re2 (2/2)	Pediococcus acidilactici	Ped. BF6	4.461	7.384	82.49 ± 0.30	78.00 ± 1.71	10.78 ± 5.79	-	-
Broiler	TFA P5 Re2 (2/1)	Pediococcus acidilactici	Ped. BF7	2.813	6.701	-	-	-	-	-
Broiler	TFA P5 Re3 (3/2)	Pediococcus acidilactici	Ped. BF8	4.049	7	73.53 ± 0.73	6.33 ± 6.09	12.73 ± 1.30	-	-
Broiler	TFB P1 Re3 (3/1)	Pediococcus acidilactici	Ped. BF9	4.989	7.095	84.77 ± 1.34	68.56 ± 0.78	72.62 ± 0.48	98.93 ± 0.24	103.96 ± 10.53
Broiler	TFB P1 Re3 (3/2)	Pediococcus acidilactici	Ped. BF10	2.477	7	-	-	-	-	-
Broiler	TFB P2 Re2 (2/1)	Pediococcus acidilactici	Ped. BF11	3.079	3.903	-	-	-	-	-
Broiler	TFB P4 Re1 (1/1)	Ligilactobacillus salivarius	Lac. BF12	7.477	4.217	71.75 ± 1.63	49.08 ± 0.38	58.58 ± 1.22	98.41 ± 1.18	132.79 ± 2.54
Broiler	TFB P4 Re2 (2/2)	Pediococcus acidilactici	Ped. BF13	2.602	6.274	-	-	-	-
Broiler	TFB P4 Re3 (3/1)	Pediococcus acidilactici	Ped. BF14	6.42	5.756	72.20 ± 0.29	47.25 ± 4.50	56.58 ± 0.13	96.99 ± 0.66	114.95 ± 20.22
Broiler	TFB P5 Re2 (2/1)	Pediococcus acidilactici	Ped. BF15	5.703	3.455	-	-	-	-	-
Broiler	C1 R1 (1/2)	Ligilactobacillus salivarius	Lac. BF16	4.146	3.684	-	-	-	-	-
Broiler	C2 R1 (1/1)	Pediococcus acidilactici	Ped. BF17	3.398	5.243	-	-	-	-	-
Broiler	C3 R1 (1/1)	Pediococcus acidilactici	Ped. BF18	6.23	4.597	63.07 ± 1.09	11.72 ± 1.36	0	-	-
Broiler	C6 R2 (2/2)	Pediococcus acidilactici	Ped. BF19	4.681	4.254	65.12 ± 1.97	6.91 ± 3.78	0	-	-
Broiler	C6 R3 (3/1)	Pediococcus acidilactici	Ped. BF20	3.562	4.317	-	-	-	-	-
Broiler	D1 R1 (1/1)	Pediococcus acidilactici	Ped. BF21	2	3.607	-	-	-	-	-
Broiler	D1 R2 (2/1)	Pediococcus acidilactici	Ped. BF22	0	4.525	-	-	-	-	-
Broiler	D1 R3 (3/2)	Pediococcus acidilactici	Ped. BF23	3.829	3.744	-	-	-	-	-
Broiler	D3 R1 (1/2)	Pediococcus acidilactici	Ped. BF24	7.166	0	-	-	-	-	-
Broiler	D3 R1 (1/3)	Pediococcus acidilactici	Ped. BF25	0	6.74	-	-	-	-	-
Broiler	D3 R2 (2/1)	Pediococcus acidilactici	Ped. BF26	0	4.119	-	-	-	-	-
Broiler	D4 R1 (1/1)	Pediococcus acidilactici	Ped. BF27	0	4.271	-	-	-	-	-
Broiler	D6 R2 (2/1)	Pediococcus acidilactici	Ped. BF28	0	5.801	-	-	-	-	-
Thai native chicken	E1 R3 (3/2)	Ligilactobacillus salivarius	Lac. BYF1	7.477	4.332	0	0	-	-	-
Thai native chicken	E2 R1 (1/1)	Pediococcus acidilactici	Ped. BYF2	0	7.611	-	-	-	-	-
Thai native chicken	E2 R1 (1/2)	Pediococcus acidilactici	Ped. BYF3	0	7.65	-	-	-	-	-
Thai native chicken	E2 R2 (2/1)	Limosilactobacillus fermentum	Lac. BYF4	6.346	3.727	-	-	-	-	-
Thai native chicken	E2 R2 (2/2)	Limosilactobacillus fermentum	Lac. BYF5	6.716	3.778	-	-	-	-	-
Thai native chicken	E2 R3 (3/2)	Pediococcus acidilactici	Ped. BYF6	0	7.611	-	-	-	-	-
Thai native chicken	E2 R3 (3/3)	Pediococcus acidilactici	Ped. BYF7	0	7.568	-	-	-	-	-
Thai native chicken	E3 R1 (1/1)	Ligilactobacillus salivarius	Lac. BYF8	0	4.002	-	-	-	-	-
Thai native chicken	E3 R1 (1/3)	Ligilactobacillus salivarius	Lac. BYF9	7	3	-	-	-	-	-
Thai native chicken	E3 R3 (3/1)	Ligilactobacillus salivarius	Lac. BYF10	7.525	0	-	-	-	-	-
Thai native chicken	E3 R3 (3/2)	Ligilactobacillus salivarius	Lac. BYF11	0	5.23	-	-	-	-	-
Thai native chicken	G1 R1 (1/2)	Lactobacillus crispatus	Lac. BYF12	0	0	-	-	-	-	-
Thai native chicken	G1 R2 (2/4)	Lactobacillus kitasatonis	Lac. BYF13	0	3.993	-	-	-	-	-
Thai native chicken	G1 R3 (3/2)	Lactobacillus crispatus	Lac. BYF14	0	0	-	-	-	-	-
Thai native chicken	G2 R3 (3/1)	Lactobacillus kitasatonis	Lac. BYF15	0	4.386	-	-	-	-	-
Thai native chicken	G3 R1 (1/2)	Lactobacillus kitasatonis	Lac. BYF16	4.146	0	-	-	-	-	-
Thai native chicken	G3 R1 (1/3)	Lactobacillus kitasatonis	Lac. BYF17	4.72	3.845	-	-	-	-	-
Thai native chicken	G3 R1 (1/4)	Lactobacillus kitasatonis	Lac. BYF18	2	0	-	-	-	-	-
Thai native chicken	H1 R1 (1/2)	Pediococcus acidilactici	Ped. BYF19	6.334	7.709	78.42 ± 0.44	69.25 ± 2.23	47.82 ± 0.15	77.88 ± 0.00	-
Thai native chicken	H1 R1 (1/3)	Pediococcus acidilactici	Ped. BYF20	7.097	7.559	78.15 ± 0.54	72.11 ± 0.57	52.76 ± 0.04	78.09 ± 0.01	102.93 ± 5.96
Thai native chicken	H1 R1 (1/4)	Pediococcus acidilactici	Ped. BYF21	7.141	7.366	79.14 ± 0.24	74.99 ± 0.57	9.02 ± 12.75	78.82 ± 0.11	-
Thai native chicken	H1 R1 (1/6)	Lactobacillus crispatus	Lac. BYF22	0	5.171	-	-	-	-	-
Thai native chicken	H1 R1 (1/7)	Lactobacillus crispatus	Lac. BYF23	0	5.025	-	-	-	-	-
Thai native chicken	H1 R2 (2/2)	Lactobacillus kitasatonis	Lac. BYF24	0	0	-	-	-	-	-
Thai native chicken	H1 R2 (2/3)	Lactobacillus kitasatonis	Lac. BYF25	0	2	-	-	-	-	-
Thai native chicken	H1 R3 (3/1)	Pediococcus acidilactici	Ped. BYF26	7.477	7.667	82.11 ± 0.81	75.55 ± 1.38	67.10 ± 2.00	98.36 ± 0.70	114.07 ± 3.76
Thai native chicken	H1 R3 (3/2)	Pediococcus acidilactici	Ped. BYF27	6.885	7.72	57.51 ± 7.48	69.38 ± 0.13	0	-	-
Thai native chicken	H1 R3 (3/3)	Pediococcus acidilactici	Ped. BYF28	6.954	7.23	53.02 ± 5.58	65.56 ± 6.38	0	-	-
Laying hen	A1/1	Pediococcus pentosaceus	Ped. LF11	3	5.319	-	-	-	-	-
Laying hen	A1/2	Pediococcus pentosaceus	Ped. LF12	3.222	5.156	-	-	-	-	-
Laying hen	A1/3	Pediococcus pentosaceus	Ped. LF13	6.487	3	-	-	-	-	-
Laying hen	A1/4	Pediococcus pentosaceus	Ped. LF14	3	7.152	-	-	-	-	-
Laying hen	A1/5	Pediococcus pentosaceus	Ped. LF15	3	7.121	-	-	-	-	-
Laying hen	A1/6	Pediococcus pentosaceus	Ped. LF16	3	7.013	-	-	-	-	-
Laying hen	A1/7	Pediococcus pentosaceus	Ped. LF17	3	4.301	-	-	-	-	-
Laying hen	A1/8	Pediococcus pentosaceus	Ped. LF18	3	3.875	-	-	-	-	-
Laying hen	A2/3	Ligilactobacillus salivarius	Lac. LF19	4.204	3	-	-	-	-	-
Laying hen	B1/2	Ligilactobacillus salivarius	Lac. LF20	6.305	3	-	-	-	-	-
Laying hen	B2/1	Ligilactobacillus salivarius	Lac. LF21	3	3	-	-	-	-	-
Laying hen	B2/2	Ligilactobacillus salivarius	Lac. LF22	4.061	3	-	-	-	-	-
Laying hen	B2/6	Ligilactobacillus salivarius	Lac. LF23	2.824	3	-	-	-	-	-
Laying hen	B3/1	Pediococcus pentosaceus	Ped. LF24	3	3	-	-	-	-	-
Laying hen	B3/2	Pediococcus pentosaceus	Ped. LF25	3	3	-	-	-	-	-
Laying hen	B3/3	Pediococcus pentosaceus	Ped. LF26	3	4.79	-	-	-	-	-
Laying hen	B3/4	Pediococcus pentosaceus	Ped. LF27	3	3	-	-	-	-	-
Laying hen	B3/5	Pediococcus pentosaceus	Ped. LF28	3	3	-	-	-	-	-
Laying hen	B3/6	Pediococcus pentosaceus	Ped. LF29	3	3	-	-	-	-	-
Laying hen	B3/7	Pediococcus pentosaceus	Ped. LF30	3	3	-	-	-	-	-
Laying hen	B3/8	Pediococcus pentosaceus	Ped. LF31	3	3	-	-	-	-	-
Laying hen	B4/3	Ligilactobacillus salivarius	Lac. LF32	3	3	-	-	-	-	-
Laying hen	B4/8	Ligilactobacillus salivarius	Lac. LF33	5.653	3	-	-	-	-	-
Laying hen	B5/8	Ligilactobacillus salivarius	Lac. LF34	6.226	2.921	-	-	-	-	-
Laying hen	B6/1	Ligilactobacillus salivarius	Lac. LF35	5.643	3.684	-	-	-	-	-
