# Supplementary material for: Selection and evaluation of lactic acid bacteria from chicken feces in Thailand as potential probiotics
Source: PeerJ. 2023 Dec 14;11:e16637. doi: 10.7717/peerj.16637 (PMC10725671; doi:10.7717/peerj.16637)
Supplement: Supplemental Information 4 [file peerj-11-16637-s004.xlsx]

## Sheet: Raw data of Table 2.
Table S4: antimicrobial activity of 5 LAB isolates against 23 Salmonella enterica strains
LAB isolate		pH after 24 h	Typhimurium 1				Typhimurium 2				Typhimurium 3				Typhimurium 4				Typhimurium 5				Typhimurium 6				Typhimurium 7				Agona 1				Agona 2				Kentucky 1				Kentucky 2				Virchow 1
			Inhibition Zone (mm): ZDI	Mean (mm)	SD	Inhibition level	Inhibition Zone (mm): ZDI	Mean (mm)	SD	Inhibition level	Inhibition Zone (mm): ZDI	Mean (mm)	SD	Inhibition level	Inhibition Zone (mm): ZDI	Mean (mm)	SD	Inhibition level	Inhibition Zone (mm): ZDI	Mean (mm)	SD	Inhibition level	Inhibition Zone (mm): ZDI	Mean (mm)	SD	Inhibition level	Inhibition Zone (mm): ZDI	Mean (mm)	SD	Inhibition level	Inhibition Zone (mm): ZDI	Mean (mm)	SD	Inhibition level	Inhibition Zone (mm): ZDI	Mean (mm)	SD	Inhibition level	Inhibition Zone (mm): ZDI	Mean (mm)	SD	Inhibition level	Inhibition Zone (mm): ZDI	Mean (mm)	SD	Inhibition level	Inhibition Zone (mm): ZDI	Mean (mm)	SD
P. acidilactici BF9	1	3.89	15.5	15.8333	2.02073	strong active	16	16	2.5	strong active	18.25	16.0833	3.32916	strong active	18	16	3.4641	strong active	18	16.75	1.95256	strong active	18.25	16.5	3.92906	strong active	15.5	15.6667	0.763763	strong active	18	16.8333	1.60728	strong active	18.5	17.1667	3.68556	strong active	17	17.1667	1.75594	strong active	17.5	17	1.96822	strong active	17	16.89	0.840417
	2	3.88	18				18.5				17.75				18				17.75				19.25				16.5				17.5				20				19				18.67				17.67
	3	4.08	14				13.5				12.25				12				14.5				12				15				15				13				15.5				14.83				16
L. salivarius BF12	1	3.87	16.5	17.1667	0.763763	strong active	17	17.5433	0.831044	strong active	18.25	17.5833	0.946485	strong active	17	17.5	3.77492	strong active	17.5	18.5	1	strong active	18.17	17.2233	2.39471	strong active	15.75	16.3067	0.758046	strong active	17.25	18.14	1.3309	strong active	17	17.11	3.33636	strong active	17	18.89	2.45892	strong active	17.75	19.0267	1.60612	strong active	14.67	16.9733	2.09037
	2	3.8	18				18.5				18				21.5				18.5				19				17.17				19.67				20.5				21.67				20.83				18.75
	3	3.85	17				17.13				16.5				14				19.5				14.5				16				17.5				13.83				18				18.5				17.5
P. acidilactici BF14	1	3.92	16	16.4433	1.22663	strong active	17	16.5	1.32288	strong active	18	16.89	1.01799	strong active	17.25	17.9167	1.37689	strong active	18.5	18.3333	0.288675	strong active	16.75	17.5	0.901388	strong active	16.25	18.25	2	strong active	16.25	19.0433	3.17736	strong active	18	18.8333	1.66458	strong active	16.25	18.4167	1.89297	strong active	19.67	20.8633	1.65292	very strong active	16.5	16.6667	1.50693
	2	3.88	17.83				17.5				16.67				19.5				18				17.25				20.25				18.38				20.75				19.75				22.75				18.25
	3	3.86	15.5				15				16				17				18.5				18.5				18.25				22.5				17.75				19.25				20.17				15.25
P. acidilactici BYF20	1	3.86	17.75	17.6667	0.877971	strong active	17	17.1933	4.04347	strong active	19.5	17.11	2.111	strong active	17	17.3333	1.52753	strong active	17.5	17.5	0	strong active	19.75	18.4433	1.25385	strong active	17.75	17.5833	0.144338	strong active	17	18.5833	2.96156	strong active	20.83	19.22	1.51205	strong active	17.5	18.9733	1.93898	strong active	20.5	21.3333	1.44338	very strong active	18	17.5	2.29129
	2	3.87	18.5				21.33				16.33				19				17.5				17.25				17.5				16.75				19				21.17				23				19.5
	3	3.9	16.75				13.25				15.5				16				17.5				18.33				17.5				22				17.83				18.25				20.5				15
P. acidilactici BYF26	1	3.88	19	16.8333	2.25462	strong active	18.5	16.7833	1.49694	strong active	16.5	16.4433	1.41585	strong active	18.5	17.5833	1.01036	strong active	21.5	19	2.78388	strong active	17	15.8333	1.12731	strong active	16.5	16.8333	1.04083	strong active	17.75	16.1667	1.6266	strong active	17.67	17.7233	0.751421	strong active	17.25	17.2933	1.56545	strong active	18	19.1667	1.12731	strong active	19.83	17.61	2.77422
	2	3.88	17				15.75				17.83				17.75				19.5				15.75				18				16.25				18.5				18.88				20.25				18.5
	3	3.9	14.5				16.1				15				16.5				16				14.75				16				14.5				17				15.75				19.25				14.5
less active (+), moderately active (++), strong active (+++) and very strong active (++++) with ZDIs ≤10 mm, 11-14 mm, 15-19 mm and (≥ 20 mm). respectively.
[truncated: 45 more columns]
