# Supplementary material for: Selection and evaluation of lactic acid bacteria from chicken feces in Thailand as potential probiotics
Source: PeerJ journal article supplement (doi:10.7717/peerj.16637), 2023-12-14
Supplement: Supplemental_Data_S2.pdf [file Supplemental_Data_S2.pdf]

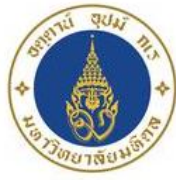

### Antimicrobial Resistant Gene Detection Report

Date :05.11.2020

|                               |                             |                                                                                                                                                                                        |                                    |
|-------------------------------|-----------------------------|----------------------------------------------------------------------------------------------------------------------------------------------------------------------------------------|------------------------------------|
| Name &<br>Address of customer |                             | Veterinary Microbiology<br>12th Floor, 60th year Veterinary Science building Faculty of Veterinary<br>Science, Chulalongkorn University, Henri-Dunant Rd., Pathumwan,<br>Bangkok 10330 |                                    |
| Sample ID / type              |                             | Ped. BYF 20                                                                                                                                                                            | PTA220                             |
| Date of sample receipt        | 27-10-2020                  | Method of test                                                                                                                                                                         | Real-time PCR with specific probes |
| Date of sample testing        | 29-10-2020 to<br>04-11-2020 | Condition of sample when receive                                                                                                                                                       | Genomic DNA                        |

### Results

|    | Antimicrobial classes                                       | Target gene     | Results |
|----|-------------------------------------------------------------|-----------------|---------|
| 1  | β-lactams<br>(penicillin,<br>amoxicillin,<br>cephalosporin) | CTX-M1          | NF      |
| 2  |                                                             | CTX-M2-M74      | NF      |
| 3  |                                                             | CTX-M8-M25      | NF      |
| 4  |                                                             | CTX-M9          | NF      |
| 5  |                                                             | PER             | NF      |
| 6  |                                                             | VEB             | NF      |
| 7  |                                                             | CMY1-MOX        | NF      |
| 8  |                                                             | CMY2-LAT        | NF      |
| 9  |                                                             | DHA             | NF      |
| 10 |                                                             | FOX             | NF      |
| 11 |                                                             | ACT-MIR         | NF      |
| 12 |                                                             | OXA-1           | NF      |
| 15 | Carbapenems                                                 | KPC             | NF      |
| 16 |                                                             | NDM             | NF      |
| 17 |                                                             | VIM             | NF      |
| 18 |                                                             | IMP             | NF      |
| 19 |                                                             | OXA-48          | NF      |
| 20 | Folate pathway<br>inhibitors                                | <i>sul1</i>     | NF      |
| 21 |                                                             | <i>sul2</i>     | NF      |
| 22 |                                                             | <i>sul3</i>     | NF      |
| 23 |                                                             | <i>dfra1</i>    | NF      |
| 24 |                                                             | <i>dfra5-14</i> | NF      |
| 25 |                                                             | <i>dfra12</i>   | NF      |
| 26 |                                                             | <i>dfra17</i>   | NF      |

|    | Antimicrobial classes | Target gene       | Results |
|----|-----------------------|-------------------|---------|
| 27 | Polymyxins            | <i>mcr-1</i>      | NF      |
| 28 |                       | <i>mcr-2</i>      | NF      |
| 29 | Tetracyclines         | <i>tetA</i>       | NF      |
| 30 |                       | <i>tetB</i>       | NF      |
| 31 | Phenicols             | <i>cmlA</i>       | NF      |
| 32 |                       | <i>floR</i>       | NF      |
| 33 |                       | <i>catA1</i>      | NF      |
| 34 |                       | <i>catB3</i>      | NF      |
| 35 | Aminoglycosides       | <i>aacC1</i>      | NF      |
| 36 |                       | <i>aacC2</i>      | NF      |
| 37 |                       | <i>aacC4</i>      | NF      |
| 38 |                       | <i>aphA1</i>      | NF      |
| 39 |                       | <i>aadA1-2-17</i> | NF      |
| 40 |                       | <i>aadB</i>       | NF      |
| 41 |                       | <i>armA</i>       | NF      |
| 42 |                       | <i>rmtB</i>       | NF      |
| 43 | Macrolides            | <i>ermB</i>       | NF      |
| 44 |                       | <i>mphA</i>       | NF      |
| 45 | Quinolones            | <i>qnrA</i>       | NF      |
| 46 |                       | <i>qnrS</i>       | NF      |
| 47 |                       | <i>qnrB1</i>      | NF      |
| 48 |                       | <i>qnrB4</i>      | NF      |
| 49 |                       | <i>QepA</i>       | NF      |

~ 3-8 X10<sup>6</sup> cells was tested. Positive grading criteria: 1+ = ≥ 10<sup>1</sup>-10<sup>2</sup>, 2+ = >10<sup>2</sup>-10<sup>3</sup> and 3+ = >10<sup>3</sup> positive cells NF = Not found

Tested person: *Rattapha Chinli*  
(Ms. Rattapha Chinli)

Authorized person: *Suporn Foongladda*  
(Assoc.Prof.Dr. Suporn Foongladda)



### Antimicrobial Resistant Gene Detection Report

Date :05.11.2020

|                               |                                                                                                                                                                                        |                                  |                                    |
|-------------------------------|----------------------------------------------------------------------------------------------------------------------------------------------------------------------------------------|----------------------------------|------------------------------------|
| Name &<br>Address of customer | Veterinary Microbiology<br>12th Floor, 60th year Veterinary Science building Faculty of Veterinary<br>Science, Chulalongkorn University, Henri-Dunant Rd., Pathumwan,<br>Bangkok 10330 |                                  |                                    |
| Sample ID / type              | Ped. BYF 26                                                                                                                                                                            | PTA221                           |                                    |
| Date of sample receipt        | 27-10-2020                                                                                                                                                                             | Method of test                   | Real-time PCR with specific probes |
| Date of sample testing        | 29-10-2020 to<br>04-11-2020                                                                                                                                                            | Condition of sample when receive | Genomic DNA                        |

### Results

|    | Antimicrobial classes                                       | Target gene     | Results |
|----|-------------------------------------------------------------|-----------------|---------|
| 1  | β-lactams<br>(penicillin,<br>amoxicillin,<br>cephalosporin) | CTX-M1          | NF      |
| 2  |                                                             | CTX-M2-M74      | NF      |
| 3  |                                                             | CTX-M8-M25      | NF      |
| 4  |                                                             | CTX-M9          | NF      |
| 5  |                                                             | PER             | NF      |
| 6  |                                                             | VEB             | NF      |
| 7  |                                                             | CMY1-MOX        | NF      |
| 8  |                                                             | CMY2-LAT        | NF      |
| 9  |                                                             | DHA             | NF      |
| 10 |                                                             | FOX             | NF      |
| 11 |                                                             | ACT-MIR         | NF      |
| 12 |                                                             | OXA-1           | NF      |
| 15 | Carbapenems                                                 | KPC             | NF      |
| 16 |                                                             | NDM             | NF      |
| 17 |                                                             | VIM             | NF      |
| 18 |                                                             | IMP             | NF      |
| 19 |                                                             | OXA-48          | NF      |
| 20 | Folate pathway<br>inhibitors                                | <i>sul1</i>     | NF      |
| 21 |                                                             | <i>sul2</i>     | NF      |
| 22 |                                                             | <i>sul3</i>     | NF      |
| 23 |                                                             | <i>dfra1</i>    | NF      |
| 24 |                                                             | <i>dfra5-14</i> | NF      |
| 25 |                                                             | <i>dfra12</i>   | NF      |
| 26 |                                                             | <i>dfra17</i>   | NF      |

|    | Antimicrobial classes | Target gene       | Results |
|----|-----------------------|-------------------|---------|
| 27 | Polymyxins            | <i>mcr-1</i>      | NF      |
| 28 |                       | <i>mcr-2</i>      | NF      |
| 29 | Tetracyclines         | <i>tetA</i>       | NF      |
| 30 |                       | <i>tetB</i>       | NF      |
| 31 | Phenicols             | <i>cmlA</i>       | NF      |
| 32 |                       | <i>floR</i>       | NF      |
| 33 |                       | <i>catA1</i>      | NF      |
| 34 |                       | <i>catB3</i>      | NF      |
| 35 | Aminoglycosides       | <i>aacC1</i>      | NF      |
| 36 |                       | <i>aacC2</i>      | NF      |
| 37 |                       | <i>aacC4</i>      | NF      |
| 38 |                       | <i>aphA1</i>      | NF      |
| 39 |                       | <i>aadA1-2-17</i> | NF      |
| 40 |                       | <i>aadB</i>       | NF      |
| 41 |                       | <i>armA</i>       | NF      |
| 42 | <i>rmtB</i>           | NF                |         |
| 43 | Macrolides            | <i>ermB</i>       | NF      |
| 44 |                       | <i>mphA</i>       | NF      |
| 45 | Quinolones            | <i>qnrA</i>       | NF      |
| 46 |                       | <i>qnrS</i>       | NF      |
| 47 |                       | <i>qnrB1</i>      | NF      |
| 48 |                       | <i>qnrB4</i>      | NF      |
| 49 |                       | <i>QepA</i>       | NF      |

~ 3-8 X10<sup>6</sup> cells was tested. Positive grading criteria: 1+ : ≥ 10<sup>1</sup>-10<sup>2</sup>, 2+ : >10<sup>2</sup>-10<sup>3</sup> and 3+ = >10<sup>3</sup> positive cells NF = Not found

Tested person: *Rattapha Chinli*  
(Ms. Rattapha Chinli)

Authorized person: *Suporn Foongladda*  
(Assoc.Prof.Dr. Suporn Foongladda)



## Antimicrobial Resistant Gene Detection Report

Date :05.11.2020

|                               |                                                                                                                                                                                        |                                  |                                    |
|-------------------------------|----------------------------------------------------------------------------------------------------------------------------------------------------------------------------------------|----------------------------------|------------------------------------|
| Name &<br>Address of customer | Veterinary Microbiology<br>12th Floor, 60th year Veterinary Science building Faculty of Veterinary<br>Science, Chulalongkorn University, Henri-Dunant Rd., Pathumwan,<br>Bangkok 10330 |                                  |                                    |
| Sample ID / type              | Ped. BF 9                                                                                                                                                                              | PTA222                           |                                    |
| Date of sample receipt        | 27-10-2020                                                                                                                                                                             | Method of test                   | Real-time PCR with specific probes |
| Date of sample testing        | 29-10-2020 to<br>04-11-2020                                                                                                                                                            | Condition of sample when receive | Genomic DNA                        |

### Results

|    | Antimicrobial classes                                       | Target gene     | Results |
|----|-------------------------------------------------------------|-----------------|---------|
| 1  | β-lactams<br>(penicillin,<br>amoxicillin,<br>cephalosporin) | CTX-M1          | NF      |
| 2  |                                                             | CTX-M2-M74      | NF      |
| 3  |                                                             | CTX-M8-M25      | NF      |
| 4  |                                                             | CTX-M9          | NF      |
| 5  |                                                             | PER             | NF      |
| 6  |                                                             | VEB             | NF      |
| 7  |                                                             | CMY1-MOX        | NF      |
| 8  |                                                             | CMY2-LAT        | NF      |
| 9  |                                                             | DHA             | NF      |
| 10 |                                                             | FOX             | NF      |
| 11 |                                                             | ACT-MIR         | NF      |
| 12 |                                                             | OXA-1           | NF      |
| 15 | Carbapenems                                                 | KPC             | NF      |
| 16 |                                                             | NDM             | NF      |
| 17 |                                                             | VIM             | NF      |
| 18 |                                                             | IMP             | NF      |
| 19 |                                                             | OXA-48          | NF      |
| 20 | Folate pathway<br>inhibitors                                | <i>sul1</i>     | NF      |
| 21 |                                                             | <i>sul2</i>     | NF      |
| 22 |                                                             | <i>sul3</i>     | NF      |
| 23 |                                                             | <i>dfra1</i>    | NF      |
| 24 |                                                             | <i>dfra5-14</i> | NF      |
| 25 |                                                             | <i>dfra12</i>   | NF      |
| 26 |                                                             | <i>dfra17</i>   | NF      |

|    | Antimicrobial classes | Target gene       | Results |
|----|-----------------------|-------------------|---------|
| 27 | Polymyxins            | <i>mcr-1</i>      | NF      |
| 28 |                       | <i>mcr-2</i>      | NF      |
| 29 | Tetracyclines         | <i>tetA</i>       | NF      |
| 30 |                       | <i>tetB</i>       | NF      |
| 31 | Phenicols             | <i>cmlA</i>       | NF      |
| 32 |                       | <i>floR</i>       | NF      |
| 33 |                       | <i>catA1</i>      | NF      |
| 34 |                       | <i>catB3</i>      | NF      |
| 35 | Aminoglycosides       | <i>aacC1</i>      | NF      |
| 36 |                       | <i>aacC2</i>      | NF      |
| 37 |                       | <i>aacC4</i>      | NF      |
| 38 |                       | <i>aphA1</i>      | NF      |
| 39 |                       | <i>aadA1-2-17</i> | NF      |
| 40 |                       | <i>aadB</i>       | NF      |
| 41 |                       | <i>armA</i>       | NF      |
| 42 | <i>rmtB</i>           | NF                |         |
| 43 | Macrolides            | <i>ermB</i>       | 3+      |
| 44 |                       | <i>mphA</i>       | NF      |
| 45 | Quinolones            | <i>qnrA</i>       | NF      |
| 46 |                       | <i>qnrS</i>       | NF      |
| 47 |                       | <i>qnrB1</i>      | NF      |
| 48 |                       | <i>qnrB4</i>      | NF      |
| 49 |                       | <i>QepA</i>       | NF      |

~ 3-8 X10<sup>6</sup> cells was tested. Positive grading criteria: 1+ : ≥ 10<sup>1</sup>-10<sup>2</sup>, 2+ : >10<sup>2</sup>-10<sup>3</sup> and 3+ = >10<sup>3</sup> positive cells NF = Not found

Tested person: *Rattapha Chinli*  
(Ms. Rattapha Chinli)

Authorized person: *Suporn Foongladda*  
(Assoc.Prof.Dr. Suporn Foongladda)



## Antimicrobial Resistant Gene Detection Report

Date :05.11.2020

|                               |                                                                                                                                                                                        |                                  |                                    |
|-------------------------------|----------------------------------------------------------------------------------------------------------------------------------------------------------------------------------------|----------------------------------|------------------------------------|
| Name &<br>Address of customer | Veterinary Microbiology<br>12th Floor, 60th year Veterinary Science building Faculty of Veterinary<br>Science, Chulalongkorn University, Henri-Dunant Rd., Pathumwan,<br>Bangkok 10330 |                                  |                                    |
| Sample ID / type              | Ped. BF 14                                                                                                                                                                             | PTA223                           |                                    |
| Date of sample receipt        | 27-10-2020                                                                                                                                                                             | Method of test                   | Real-time PCR with specific probes |
| Date of sample testing        | 29-10-2020 to<br>04-11-2020                                                                                                                                                            | Condition of sample when receive | Genomic DNA                        |

### Results

|    | Antimicrobial classes                                       | Target gene     | Results |    | Antimicrobial classes | Target gene       | Results |
|----|-------------------------------------------------------------|-----------------|---------|----|-----------------------|-------------------|---------|
| 1  | β-lactams<br>(penicillin,<br>amoxicillin,<br>cephalosporin) | CTX-M1          | NF      | 27 | Polymyxins            | <i>mcr-1</i>      | NF      |
| 2  |                                                             | CTX-M2-M74      | NF      | 28 |                       | <i>mcr-2</i>      | NF      |
| 3  |                                                             | CTX-M8-M25      | NF      | 29 | Tetracyclines         | <i>tetA</i>       | NF      |
| 4  |                                                             | CTX-M9          | NF      | 30 |                       | <i>tetB</i>       | NF      |
| 5  |                                                             | PER             | NF      | 31 | Phenicols             | <i>cmlA</i>       | NF      |
| 6  |                                                             | VEB             | NF      | 32 |                       | <i>floR</i>       | NF      |
| 7  |                                                             | CMY1-MOX        | NF      | 33 |                       | <i>catA1</i>      | NF      |
| 8  |                                                             | CMY2-LAT        | NF      | 34 |                       | <i>catB3</i>      | NF      |
| 9  |                                                             | DHA             | NF      | 35 | Aminoglycosides       | <i>aacC1</i>      | NF      |
| 10 |                                                             | FOX             | NF      | 36 |                       | <i>aacC2</i>      | NF      |
| 11 |                                                             | ACT-MIR         | NF      | 37 |                       | <i>aacC4</i>      | NF      |
| 12 |                                                             | OXA-1           | NF      | 38 |                       | <i>aphA1</i>      | NF      |
| 15 | Carbapenems                                                 | KPC             | NF      | 39 |                       | <i>aadA1-2-17</i> | NF      |
| 16 |                                                             | NDM             | NF      | 40 |                       | <i>aadB</i>       | NF      |
| 17 |                                                             | VIM             | NF      | 41 |                       | <i>armA</i>       | NF      |
| 18 |                                                             | IMP             | NF      | 42 | <i>rmtB</i>           | NF                |         |
| 19 |                                                             | OXA-48          | NF      | 43 | Macrolides            | <i>ermB</i>       | 3+      |
| 20 | Folate pathway<br>inhibitors                                | <i>sul1</i>     | NF      | 44 |                       | <i>mphA</i>       | NF      |
| 21 |                                                             | <i>sul2</i>     | NF      | 45 | Quinolones            | <i>qnrA</i>       | NF      |
| 22 |                                                             | <i>sul3</i>     | NF      | 46 |                       | <i>qnrS</i>       | NF      |
| 23 |                                                             | <i>dfra1</i>    | NF      | 47 |                       | <i>qnrB1</i>      | NF      |
| 24 |                                                             | <i>dfra5-14</i> | NF      | 48 |                       | <i>qnrB4</i>      | NF      |
| 25 |                                                             | <i>dfra12</i>   | NF      | 49 |                       | <i>QepA</i>       | NF      |
| 26 |                                                             | <i>dfra17</i>   | NF      |    |                       |                   |         |

~ 3-8 X10<sup>6</sup> cells was tested. Positive grading criteria: 1+ : ≥ 10<sup>1</sup>-10<sup>2</sup>, 2+ : >10<sup>2</sup>-10<sup>3</sup> and 3+ = >10<sup>3</sup> positive cells NF = Not found

Tested person: *Rattapha Chinli*  
(Ms. Rattapha Chinli)

Authorized person: *Suporn Foongladda*  
(Assoc.Prof.Dr. Suporn Foongladda)



## Antimicrobial Resistant Gene Detection Report

Date :05.11.2020

|                               |                                                                                                                                                                                        |                                  |                                    |
|-------------------------------|----------------------------------------------------------------------------------------------------------------------------------------------------------------------------------------|----------------------------------|------------------------------------|
| Name &<br>Address of customer | Veterinary Microbiology<br>12th Floor, 60th year Veterinary Science building Faculty of Veterinary<br>Science, Chulalongkorn University, Henri-Dunant Rd., Pathumwan,<br>Bangkok 10330 |                                  |                                    |
| Sample ID / type              | Lac. BF 12                                                                                                                                                                             | PTA224                           |                                    |
| Date of sample receipt        | 27-10-2020                                                                                                                                                                             | Method of test                   | Real-time PCR with specific probes |
| Date of sample testing        | 29-10-2020 to<br>04-11-2020                                                                                                                                                            | Condition of sample when receive | Genomic DNA                        |

### Results

|    | Antimicrobial classes                                       | Target gene     | Results |
|----|-------------------------------------------------------------|-----------------|---------|
| 1  | β-lactams<br>(penicillin,<br>amoxicillin,<br>cephalosporin) | CTX-M1          | NF      |
| 2  |                                                             | CTX-M2-M74      | NF      |
| 3  |                                                             | CTX-M8-M25      | NF      |
| 4  |                                                             | CTX-M9          | NF      |
| 5  |                                                             | PER             | NF      |
| 6  |                                                             | VEB             | NF      |
| 7  |                                                             | CMY1-MOX        | NF      |
| 8  |                                                             | CMY2-LAT        | NF      |
| 9  |                                                             | DHA             | NF      |
| 10 |                                                             | FOX             | NF      |
| 11 |                                                             | ACT-MIR         | NF      |
| 12 |                                                             | OXA-1           | NF      |
| 15 | Carbapenems                                                 | KPC             | NF      |
| 16 |                                                             | NDM             | NF      |
| 17 |                                                             | VIM             | NF      |
| 18 |                                                             | IMP             | NF      |
| 19 |                                                             | OXA-48          | NF      |
| 20 | Folate pathway<br>inhibitors                                | <i>sul1</i>     | NF      |
| 21 |                                                             | <i>sul2</i>     | NF      |
| 22 |                                                             | <i>sul3</i>     | NF      |
| 23 |                                                             | <i>dfra1</i>    | NF      |
| 24 |                                                             | <i>dfra5-14</i> | NF      |
| 25 |                                                             | <i>dfra12</i>   | NF      |
| 26 |                                                             | <i>dfra17</i>   | NF      |

|    | Antimicrobial classes | Target gene       | Results |
|----|-----------------------|-------------------|---------|
| 27 | Polymyxins            | <i>mcr-1</i>      | NF      |
| 28 |                       | <i>mcr-2</i>      | NF      |
| 29 | Tetracyclines         | <i>tetA</i>       | NF      |
| 30 |                       | <i>tetB</i>       | NF      |
| 31 | Phenicols             | <i>cmlA</i>       | NF      |
| 32 |                       | <i>floR</i>       | NF      |
| 33 |                       | <i>catA1</i>      | NF      |
| 34 |                       | <i>catB3</i>      | NF      |
| 35 | Aminoglycosides       | <i>aacC1</i>      | NF      |
| 36 |                       | <i>aacC2</i>      | NF      |
| 37 |                       | <i>aacC4</i>      | NF      |
| 38 |                       | <i>aphA1</i>      | NF      |
| 39 |                       | <i>aadA1-2-17</i> | NF      |
| 40 |                       | <i>aadB</i>       | NF      |
| 41 |                       | <i>armA</i>       | NF      |
| 42 | <i>rmtB</i>           | NF                |         |
| 43 | Macrolides            | <i>ermB</i>       | NF      |
| 44 |                       | <i>mphA</i>       | NF      |
| 45 | Quinolones            | <i>qnrA</i>       | NF      |
| 46 |                       | <i>qnrS</i>       | NF      |
| 47 |                       | <i>qnrB1</i>      | NF      |
| 48 |                       | <i>qnrB4</i>      | NF      |
| 49 |                       | <i>QepA</i>       | NF      |

~ 3-8 X10<sup>6</sup> cells was tested. Positive grading criteria: 1+ : ≥ 10<sup>1</sup>-10<sup>2</sup>, 2+ : >10<sup>2</sup>-10<sup>3</sup> and 3+ = >10<sup>3</sup> positive cells NF = Not found

Tested person: *Rattapha Chinli*  
(Ms. Rattapha Chinli)

Authorized person: *Suporn Foongladda*  
(Assoc.Prof.Dr. Suporn Foongladda)
